# Supplementary material for: Whole Genome Sequencing versus Traditional Genotyping for Investigation of a Mycobacterium tuberculosis Outbreak: A Longitudinal Molecular Epidemiological Study
Source: PubMed Central journal article supplement (PMC3570532; doi:10.1371/journal.pmed.1001387), 2013-02-12
Supplement: pmed.1001387.s006.pdf [file pmed.1001387.s006.pdf]

Table S2

| KEY      | Nationality | Age at infection | Abuse of alcohol and other drugs | HIV | Smear + | Sex (m/f) | Residence | Ab resistance | Milieu | Study | Branch |
|----------|-------------|------------------|----------------------------------|-----|---------|-----------|-----------|---------------|--------|-------|--------|
| 7761/01  | Germany     | 63               | 1                                | 0   | 0       | m         | 1         | 0             | 1      | HH    | HC     |
| 749/98   | Germany     | 39               | 1                                | 0   | 0       | m         | 1         | 0             | 1      | HH    | HC     |
| 8855/98  | Germany     | 32               | 1                                | 0   | 0       | m         | 0         | 0             | 1      | HH    | HC     |
| 4285/98  | Germany     | 58               | 0                                | 0   | 1       | m         | 0         | 0             | 1      | HH    | HC     |
| 11838/97 | Germany     | 58               | 0                                | 0   | 0       | f         | 1         | 0             | 1      | HH    | HC     |
| 5465/98  | Germany     | 60               | 1                                | 0   | 0       | m         | 0         | 0             | 1      | HH    | HC     |
| 10921/97 | Germany     | 32               | 1                                | 1   | 0       | m         | 1         | 0             | 1      | HH    | HC     |
| 10965/98 | Germany     | 42               | 1                                | 0   | 1       | m         | 1         | 0             | 1      | HH    | HC     |
| 4283/99  | Germany     | 43               | 1                                | 0   | 0       | m         | 1         | 0             | 1      | HH    | HC     |
| 7199/99  | Germany     | 40               | 0                                | 0   | 1       | m         | 1         | 0             | 1      | HH    | HC     |
| 5112/99  | Germany     | 49               | 1                                | 0   | 1       | m         | 1         | 0             | 1      | HH    | HC     |
| 5882/99  | Germany     | 40               | 1                                | 0   | 0       | m         | 1         | 0             | 1      | HH    | HC     |
| 8349/99  | Germany     | 61               | 1                                | 0   | 1       | m         | 1         | 0             | 1      | HH    | HC     |
| 7063/99  | Germany     | 66               | 1                                | 0   | 1       | m         | 1         | 0             | 1      | HH    | HC     |
| 358/00   | Germany     | 77               | 0                                | 0   | 0       | m         | 1         | 0             | 1      | HH    | HC     |
| 9538/99  | Germany     | 39               | 1                                | 0   | 0       | m         | 1         | 0             | 1      | HH    | HC     |
| 8496/99  | Germany     | 58               | 0                                | 0   | 0       | m         | 1         | 0             | 1      | HH    | HC     |
| 6257/00  | Germany     | 61               | 0                                | 0   | 0       | m         | 0         | 0             | 1      | HH    | HC     |
| 5907/00  | Germany     | 60               | 0                                | 0   | 0       | f         | 1         | 0             | 0      | HH    | HC     |
| 4605/01  | Germany     | 63               | 0                                | 0   | 0       | m         | 1         | 0             | 0      | HH    | HC     |
| 2102/01  | Germany     | 50               | 1                                | 0   | 0       | m         | 1         | 0             | 1      | HH    | HC     |
| 5694/01  | Germany     | 34               | 1                                | 0   | 0       | m         | 0         | 0             | 1      | HH    | HC     |
| 4127/02  | Germany     | 43               | 0                                | 0   | 0       | m         | 1         | 0             | 1      | HH    | HC     |
| 10566/00 | Germany     | 68               | 0                                | 0   | 0       | m         | 1         | 0             | 0      | HH    | HC     |
| 8921/02  | Germany     | 36               | 0                                | 0   | 1       | m         | 1         | 0             | 1      | HH    | HC     |
| 4217/02  | Germany     | 47               | 1                                | 0   | 1       | m         | 1         | 0             | 1      | HH    | HC     |
| 6978/03  | Germany     | 34               | 1                                | 1   | 0       | m         | 0         | 0             | 1      | HH    | HC     |
| 2382/04  | Germany     | 55               | 1                                | 0   | 0       | m         | 1         | 0             | 0      | HH    | HC     |
| 3610/04  | Germany     | 70               | 0                                | 0   | 0       | m         | 1         | 0             | 0      | HH    | HC     |
| 8782/04  | Germany     | 41               | 1                                | 0   | 0       | m         | 1         | 0             | 0      | HH    | HC     |
| 4932/05  | Germany     | 41               | 1                                | 0   | 1       | f         | 1         | 0             | 0      | HH    | HC     |
| 7196/05  | India       | 40               | 1                                | 0   | 1       | m         | 1         | 0             | 1      | HH    | HC     |
| 10325/06 | Germany     | 60               | 1                                | 0   | 1       | m         | 1         | 0             | 1      | HH    | HC     |
| 3015/08  | Germany     | 46               | 1                                | 0   | 1       | m         | 1         | 0             | 1      | HH    | HC     |
| 333/08   | Eritrea     | 65               | 1                                | 0   | 1       | m         | 1         | 0             | 1      | HH    | HC     |
| 2093/08  | Somalia     | 25               | 1                                | 0   | 0       | m         | 1         | 0             | 0      | HH    | HC     |
| 9965/07  | Turkey      | 0                | 0                                | 0   | 0       | m         | 1         | 0             | 0      | HH    | HC     |
| 10471/07 | Germany     | 2                | 0                                | 0   | 0       | f         | 1         | 0             | 0      | HH    | HC     |
| 5277/08  | Gambia      | 54               | 1                                | 0   | 0       | m         | 1         | 0             | 1      | HH    | HC     |
| 7035/08  | Morocco     | 32               | 0                                | 0   | 1       | m         | 1         | 0             | 0      | HH    | HC     |
| 7440/08  | Germany     | 85               | 0                                | 0   | 0       | f         | 1         | 0             | 0      | HH    | HC     |
| 8199/08  | Turkey      | 48               | 0                                | 1   | 0       | f         | 1         | 0             | 1      | HH    | HC     |
| 1880/09  | Germany     | 46               | 1                                | 0   | 1       | m         | 1         | 0             | 1      | HH    | HC     |
| 2043/09  | Ecuador     | 32               | 0                                | 1   | 0       | m         | 1         | 0             | 1      | HH    | HC     |
| 2649/09  | Germany     | 31               | 1                                | 0   | 0       | m         | 1         | 0             | 1      | HH    | HC     |
| 7445/09  | Ecuador     | 22               | 0                                | 0   | 1       | f         | 1         | 0             | 1      | HH    | HC     |
| 1/09     | Germany     | 44               | 1                                | 0   | 1       | m         | 0         | 0             | 1      | HH    | HC     |
| 1520/10  | Germany     | 41               | 0                                | 1   | 0       | m         | 0         | 0             | 1      | HH    | HC     |
| 10328/06 | Germany     | 56               | 1                                | 0   | 1       | m         | 0         | 0             | 1      | SH    | HC     |
| 10947/10 | N.D.*       | 40               | 0                                | 0   | 1       | m         | 1         | 0             | 0      | SH    | HC     |
| 1125/07  | Germany     | 42               | 1                                | 0   | 0       | m         | 1         | 0             | 1      | SH    | HC     |
| 11395/09 | Germany     | 37               | 0                                | 0   | 1       | f         | 1         | 0             | 0      | SH    | HC     |
| 1311/09  | N.D.*       | 30               | 1                                | 0   | 1       | m         | 1         | 0             | 1      | SH    | HC     |
| 2012/06  | Germany     | 36               | 1                                | 0   | 1       | f         | 0         | 0             | 1      | SH    | HC     |
| 2375/10  | Germany     | 47               | 1                                | 0   | 1       | f         | 1         | 0             | 1      | SH    | HC     |
| 3050/06  | Germany     | 57               | 1                                | 0   | 1       | m         | 0         | 0             | 1      | SH    | HC     |
| 3601/07  | Germany     | 47               | 1                                | 0   | 1       | m         | 1         | 0             | 1      | SH    | HC     |
| 3670/10  | Germany     | 19               | 0                                | 0   | 0       | f         | 1         | 0             | 0      | SH    | HC     |
| 4169/10  | Germany     | 50               | 0                                | 0   | 1       | m         | 1         | 0             | 0      | SH    | HC     |
| 4242/07  | Mauritania  | 45               | 1                                | 0   | 1       | m         | 1         | 0             | 1      | SH    | HC     |
| 4414/09  | Germany     | 15               | 0                                | 0   | 0       | m         | 1         | 0             | 1      | SH    | HC     |
| 446/07   | Germany     | 42               | 1                                | 0   | 0       | m         | 0         | 0             | 1      | SH    | HC     |
| 4606/09  | Germany     | 25               | 0                                | 0   | 0       | f         | 1         | 0             | 1      | SH    | HC     |
| 5050/10  | Germany     | 35               | 1                                | 0   | 1       | m         | 1         | 0             | 1      | SH    | HC     |
| 5209/06  | Germany     | 28               | 1                                | 0   | 0       | f         | 1         | 0             | 1      | SH    | HC     |
| 5767/06  | Germany     | 50               | 1                                | 0   | 0       | m         | 0         | 0             | 1      | SH    | HC     |
| 581/10   | Germany     | 50               | 1                                | 0   | 1       | m         | 1         | 0             | 1      | SH    | HC     |
| 6030/10  | N.D.*       | 60               | 0                                | 0   | 0       | f         | 1         | 0             | 0      | SH    | HC     |
| 6856/10  | N.D.*       | 49               | 1                                | 0   | 1       | m         | 1         | 0             | 1      | SH    | HC     |
| 8749/06  | N.D.*       | 3                | 0                                | 0   | 0       | m         | 1         | 0             | 0      | SH    | HC     |
| 8816/08  | Turkey      | 46               | 1                                | 0   | 1       | m         | 0         | 0             | 1      | SH    | HC     |
| 9516/10  | Germany     | 26               | 0                                | 0   | 0       | m         | 1         | 0             | 0      | SH    | HC     |
| 1857/98  | Germany     | 61               | 1                                | 0   | 0       | m         | 1         | 0             | 1      | HH    | UN     |
| 9918/97  | Germany     | 40               | 1                                | 0   | 0       | m         | 1         | 0             | 1      | HH    | UN     |
| 11475/98 | Germany     | 43               | 0                                | 0   | 1       | m         | 1         | 0             | 1      | HH    | UN     |
| 7196/99  | Germany     | 52               | 0                                | 0   | 1       | m         | 0         | 0             | 1      | HH    | UN     |
| 9752/99  | Germany     | 59               | 0                                | 0   | 0       | m         | 1         | 0             | 0      | HH    | UN     |
| 1078/00  | Germany     | 45               | 0                                | 0   | 0       | m         | 1         | 0             | 1      | HH    | UN     |
| 523/01   | Germany     | 71               | 1                                | 0   | 0       | m         | 1         | 0             | 1      | HH    | UN     |
| 5926/02  | Germany     | 68               | 0                                | 0   | 1       | m         | 1         | 0             | 0      | HH    | UN     |
| 6056/00  | Poland      | 47               | 1                                | 0   | 0       | m         | 1         | 0             | 1      | HH    | UN     |
| 9824/02  | Germany     | 50               | 1                                | 0   | 1       | f         | 0         | 0             | 1      | HH    | UN     |
| 4576/00  | Ukraine     | 41               | 1                                | 0   | 0       | m         | 0         | 0             | 1      | HH    | UN     |
| 5687/01  | Poland      | 37               | 1                                | 0   | 0       | f         | 1         | 0             | 1      | HH    | UN     |
| 8967/02  | Germany     | 52               | 1                                | 0   | 0       | m         | 1         | 0             | 1      | HH    | UN     |
| 6946/03  | Germany     | 39               | 1                                | 0   | 1       | m         | 1         | 0             | 1      | HH    | UN     |

\* Not Determined / Foreigners

HH = Hanseatic city Hamburg    HC = Hamburg Clone  
SH = Schleswig-Holstein        UN = Unsuccessful strains
